# Supplementary material for: The development, implementation, and evaluation of an optimal model for the case detection, referral, and case management of Neglected Tropical Diseases
Source: PubMed Central journal article supplement (PMC10171595; doi:10.1371/journal.pone.0283856), 2023-05-10

# Optimal Model for the Case Detection, Referral and Confirmation of Neglected Tropical Diseases

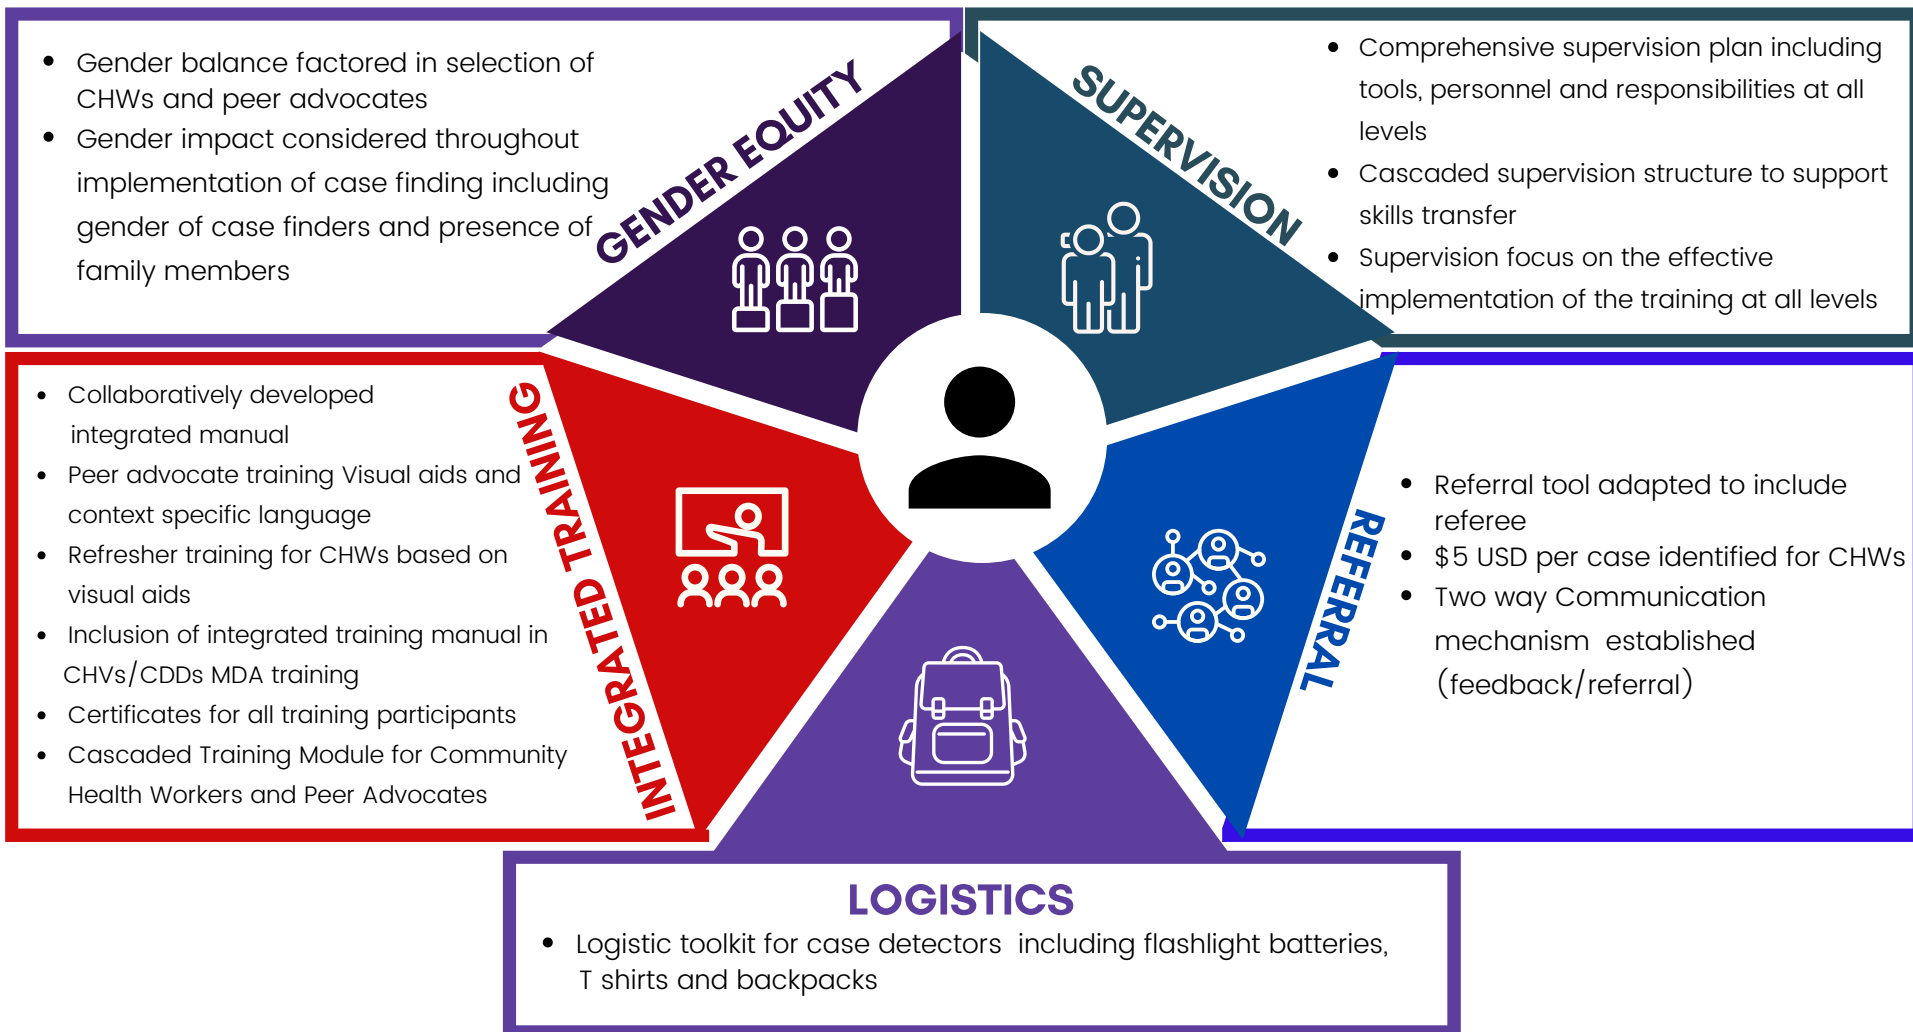

# NTD Case Finding Optimal Model

An evidence based model for the effective active case identification and referral of Neglected Tropical Diseases in low resource settings

## Integrated Training

- Cascaded Training Module for Community Health Workers and Peer Advocates
- Collaboratively developed integrated manual
- Visual aids and context specific language
- Refresher training for CHWs based on visual aids
- Inclusion of integrated training manual in CHVs/CDDs MDA training
- Peer advocate training
- Certificates for all training participants

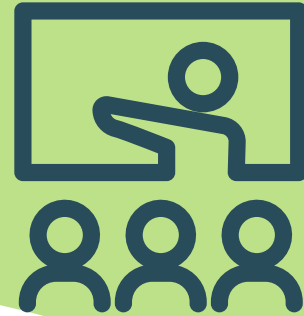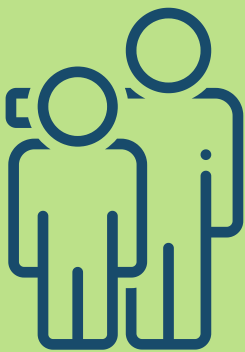

## Supervision

- Comprehensive supervision plan including tools, personnel and responsibilities at all levels
- Cascaded supervision structure to support skills transfer
- Supervision focus on the effective implementation of the training at all levels;

## Referral

- Referral tool adapted to include referee
- \$5 USD per case identified for CHWs
- Two way Communication mechanism established (feedback/referral)

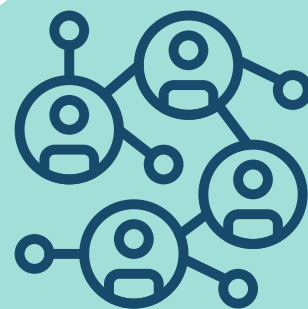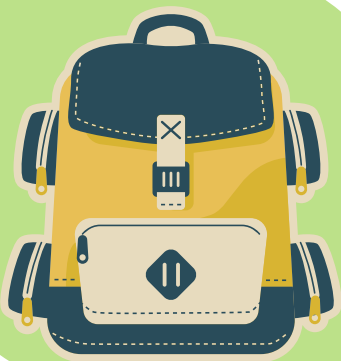

## Logistics

- Logistic toolkit for case detectors including flashlight batteries, T shirts and backpacks

## Gender Equity

- Gender balance factored in selection of CHWs and peer advocates
- Gender impact considered throughout implementation of case finding including gender of case finders and presence of family members

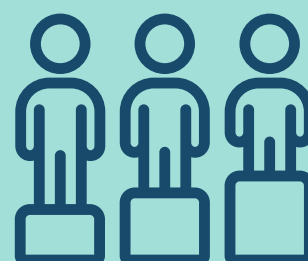

Supplement: pone.0283856.s001.pdf [file pone.0283856.s001.pdf]
