# Supplementary material for: The development, implementation, and evaluation of an optimal model for the case detection, referral, and case management of Neglected Tropical Diseases
Source: PubMed Central journal article supplement (PMC10171595; doi:10.1371/journal.pone.0283856), 2023-05-10

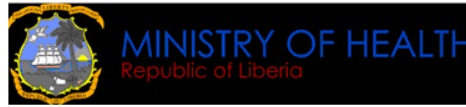

## CERTIFICATE OF TRAINING

This is to certify that

.....

Successfully completed the training course **'Module 4: Special Programs Integrated Case Management'**

Awarded:

Karsor Kollie  
Director of the Neglected Tropical  
Disease Program

Emerson Rogers  
Case Management Coordinator

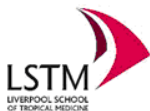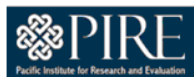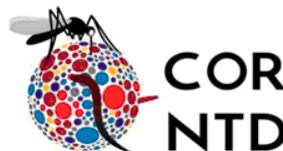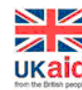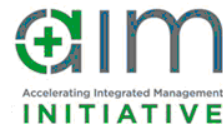

Supplement: pone.0283856.s007.pdf [file pone.0283856.s007.pdf]
