# Supplementary material for: The development, implementation, and evaluation of an optimal model for the case detection, referral, and case management of Neglected Tropical Diseases
Source: PubMed Central journal article supplement (PMC10171595; doi:10.1371/journal.pone.0283856), 2023-05-10
Supplement: pone.0283856.s009.pdf [file pone.0283856.s009.pdf]

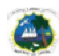

v.0.7

#### 4.0 CHA/V Monthly Service Report [p.2]

##### HIV, TB, Leprosy, Buruli Ulcer, Hydrocele, Elephantiasis, Yaws, Mental Health

##### B. Integrated Case Management of Neglected Tropical Diseases (CM NTDs)

|                                                                    | W. 1 | W. 2 | W. 3 | W. 4 | Total |
|--------------------------------------------------------------------|------|------|------|------|-------|
| 4.3A # of Patients referred to health facility for CM NTDs testing |      |      |      |      |       |
| 4.3B # of CM NTDs patients treated                                 |      |      |      |      |       |
| 4.3C # of CM NTDs patients treated                                 |      |      |      |      |       |
| 4.3D # of default CM NTDs patients treated                         |      |      |      |      |       |
| 4.3E # of new CM NTDs patients visited                             |      |      |      |      |       |
| 4.3F Total # of CM NTDs Patients visited                           |      |      |      |      |       |

##### C. HIV

|                                                                            | W. 1 | W. 2 | W. 3 | W. 4 | Total |
|----------------------------------------------------------------------------|------|------|------|------|-------|
| 4.4A # of HIV patients referred to health facility for testing and service |      |      |      |      |       |
| 4.4B # of lost to follow-up ART patients traced                            |      |      |      |      |       |

##### D. Mental Health

|                                                                          | W. 1 | W. 2 | W. 3 | W. 4 | Total |
|--------------------------------------------------------------------------|------|------|------|------|-------|
| 4.5 # of patients referred to health facility for Mental Health services |      |      |      |      |       |

5.
